# Supplementary material for: Shionone-Targeted Pneumolysin to Ameliorate Acute Lung Injury Induced by Streptococcus pneumoniae In Vivo and In Vitro
Source: MDPI journal article supplement (doi:10.3390/molecules27196258), 2022-09-23
Supplement: s1 [file s1]

Table S1 The Binding energy data between PLY and shionone.

| ligand_name                                  | $\Delta G(\text{kcal/mol})$ | Ki(nM) |
|----------------------------------------------|-----------------------------|--------|
| Structure2D_CID_12315507_config37_out1.pdbqt | -12.9                       | 0.342  |
